# Supplementary material
Source: publisher figshare collection journal article supplement (https://sage.figshare.com/ndownloader/files/14549465)

Supplementary Figure S1: Receiver Operating Characteristics curves for the prediction of severe hypoglycemia by different CGM-derived parameters

Supplementary Figure S2: Receiver Operating Characteristics curves for the prediction of the persistence of impaired awareness of hypoglycemia by different CGM-derived parameters

Supplementary Figure S1: Receiver Operating Characteristics curves for the prediction of severe hypoglycemia by different CGM-derived parameters


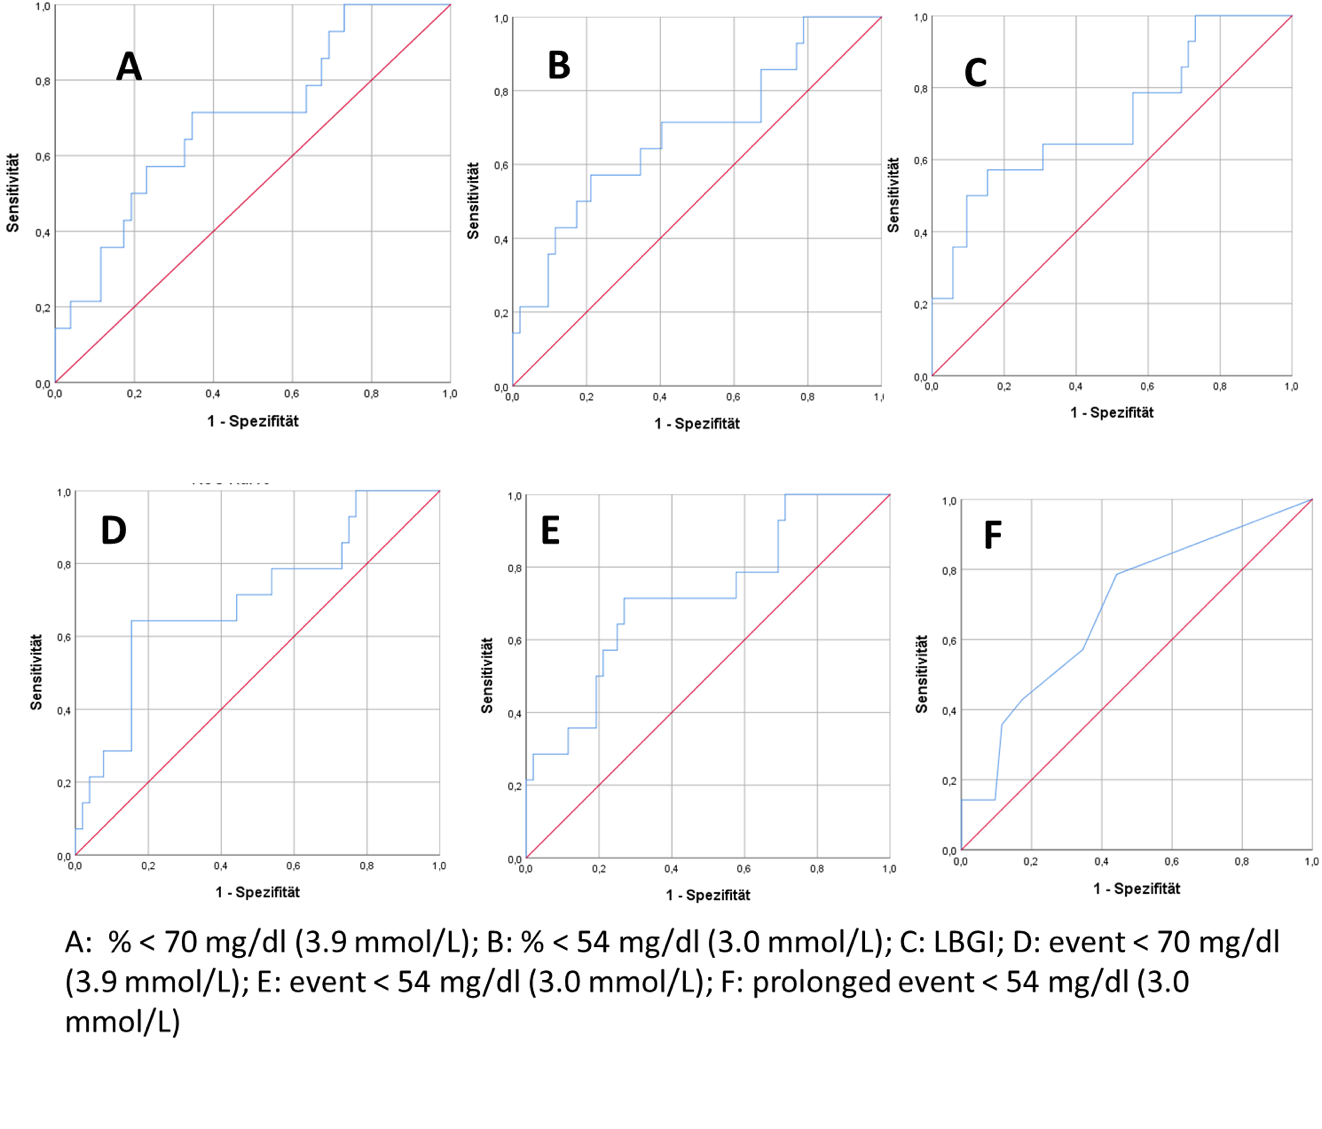


Supplementary Figure S2: Receiver Operating Characteristics curves for the prediction of the persistence of impaired awareness of hypoglycemia by different CGM-derived parameters


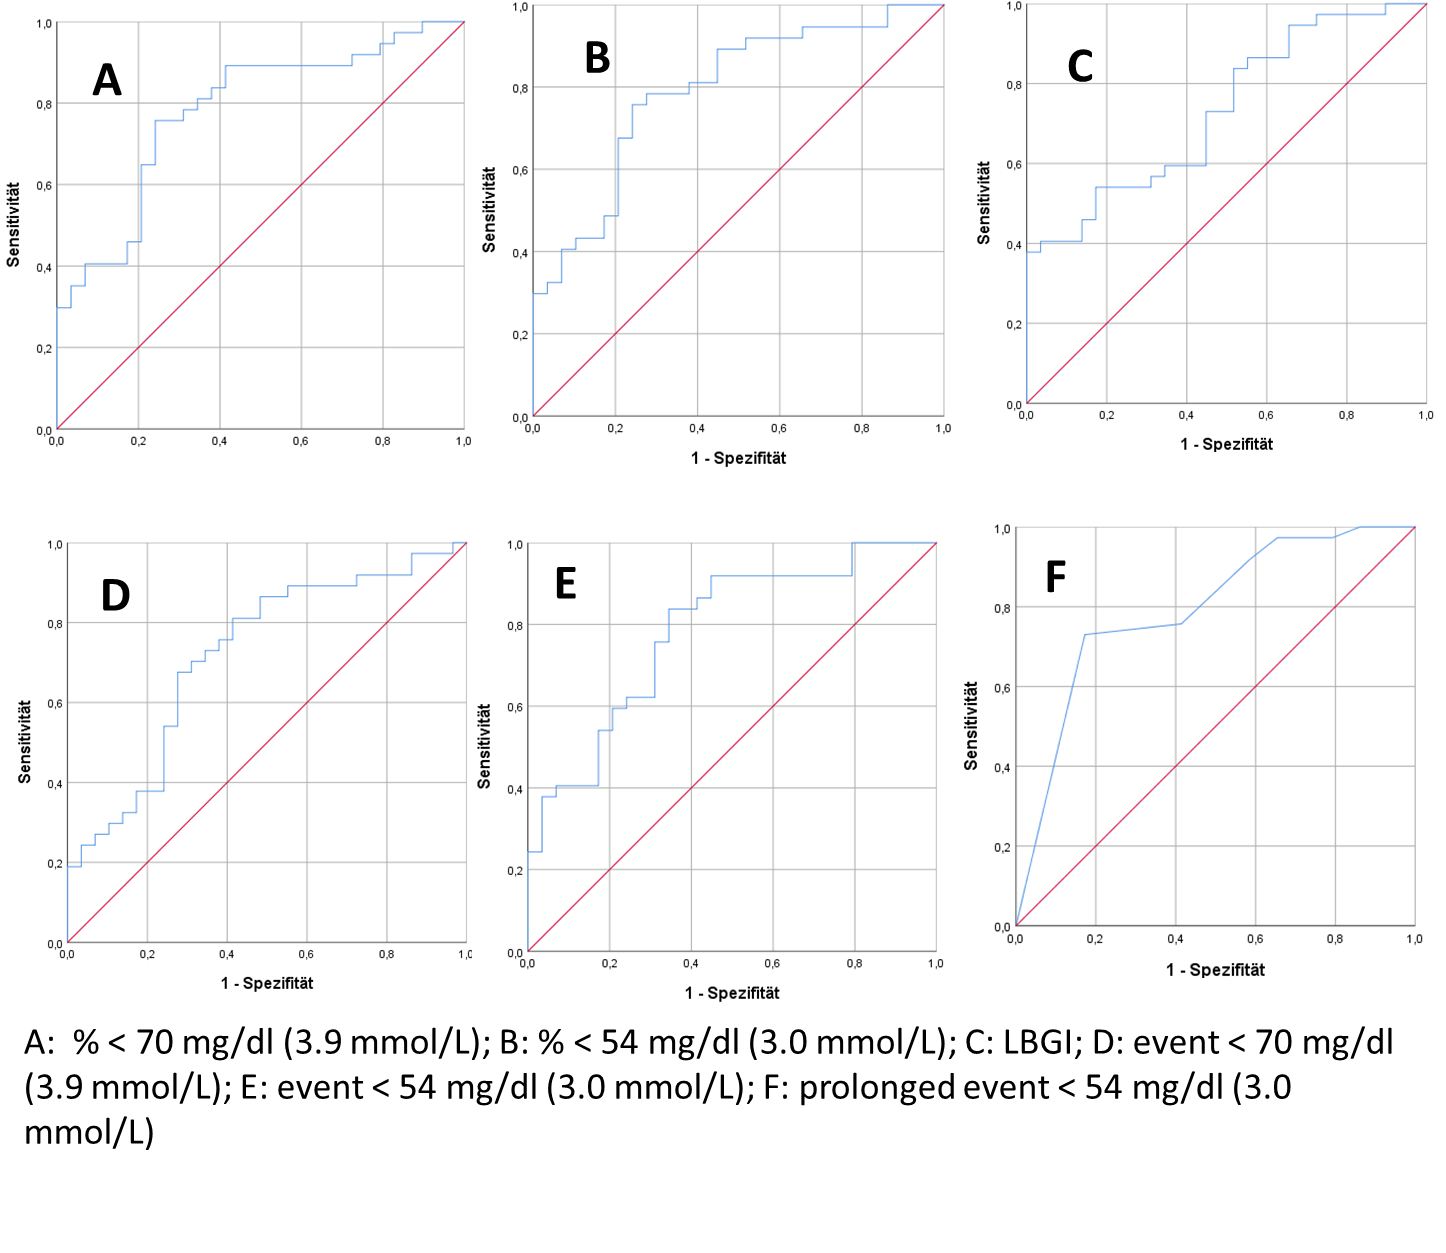

Supplement: Supplementary file 1 [file 14549465]
